# Supplementary material
Source: PubMed Central journal article supplement (PMC9303551)
Supplement: IMCB-100-112-s001.pdf [file IMCB-100-112-s001.pdf]

**Supporting Information:**

**Differential antigenic requirements by diverse MR1-restricted T cells**

Rebecca Seneviratna<sup>1,2\*</sup>, Samuel J. Redmond<sup>1,2\*</sup>, Hamish E. McWilliam<sup>1,3</sup>, Rangsim  
Reantragoon<sup>1,4,5</sup>, Jose A. Villadangos<sup>1,3</sup>, James McCluskey<sup>1</sup>, Dale I. Godfrey<sup>1,2</sup>, Nicholas A.  
Gherardin<sup>1,2</sup>

<sup>1</sup>Department of Microbiology & Immunology, Peter Doherty Institute for Infection and  
Immunity, University of Melbourne, Victoria 3000, Australia.

<sup>2</sup>Australian Research Council Centre of Excellence in Advanced Molecular Imaging,  
University of Melbourne, Parkville, Victoria 3010, Australia.

<sup>3</sup>Department of Biochemistry and Pharmacology, Bio21 Molecular Science and Biotechnology  
Institute, The University of Melbourne, Parkville, Victoria 3010, Australia.

<sup>4</sup>Present address: Immunology Division, Department of Microbiology, Faculty of Medicine,  
Chulalongkorn University, Bangkok, Thailand.

<sup>5</sup>Present address: Centre of Excellence in Immunology and Immune-mediated Diseases,  
Faculty of Medicine, Chulalongkorn University, Bangkok, Thailand

\*These authors contributed equally to this work

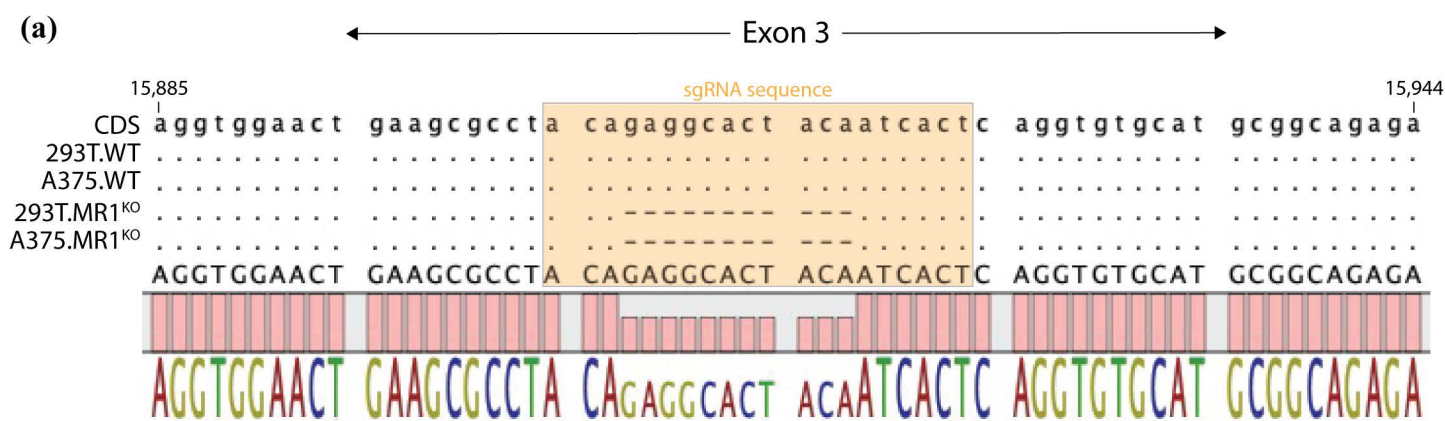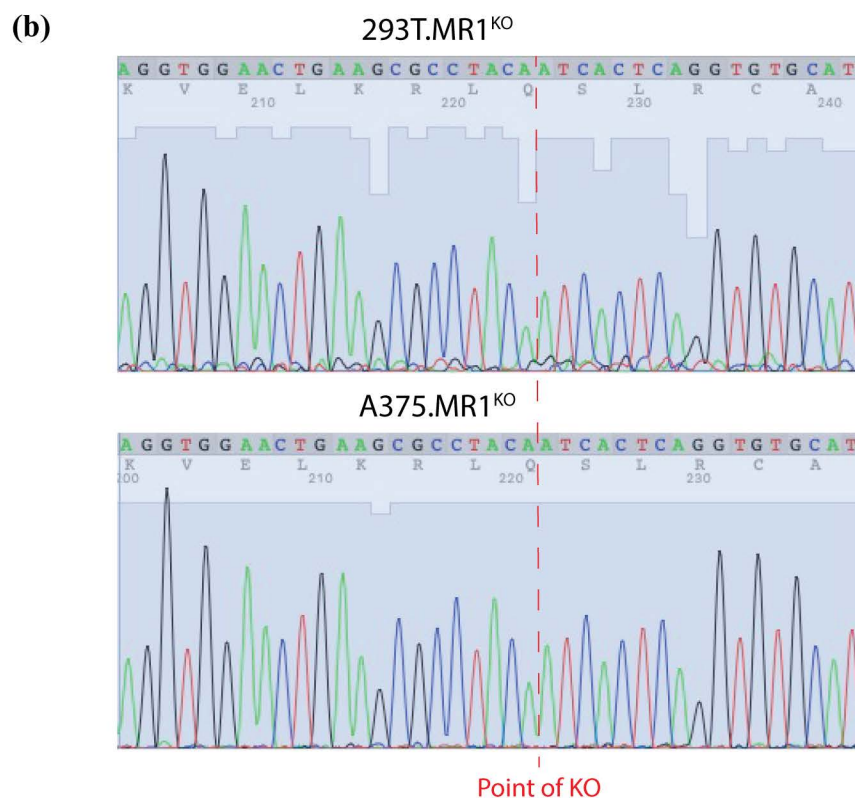

**Supplementary Figure 1: Sequence verification of CRISPR/Cas9-mediated knockout of MR1 in 293T and A375 cells.** (a) Alignment of nucleotide sequences of exon 3 of MR1 from position 15,885 to 15,944 from cDNA derived from 293T.WT, A375.WT, 293T.MR1<sup>KO</sup> and A375.MR1<sup>KO</sup> cell lines. The coding sequence (CDS) is shown at the top and is derived from NCBI reference ID NM\_001531.3. Dots represent nucleotides identical to that of the CDS. Dashes represent the absence of a nucleotide. The sequence of the sgRNA used during CRISPR/Cas9-mediated knockout is highlighted in orange. Alignment was generated using CLC Main Workbench 8 (Qiagen). (b) Sanger Sequencing trace from genomic DNA amplified from 293T.MR1<sup>KO</sup> and A375.MR1<sup>KO</sup>. The red dotted line indicated where a stretch of DNA has been removed relative to the MR1 CDS. Traces were generated using 4Peaks software.

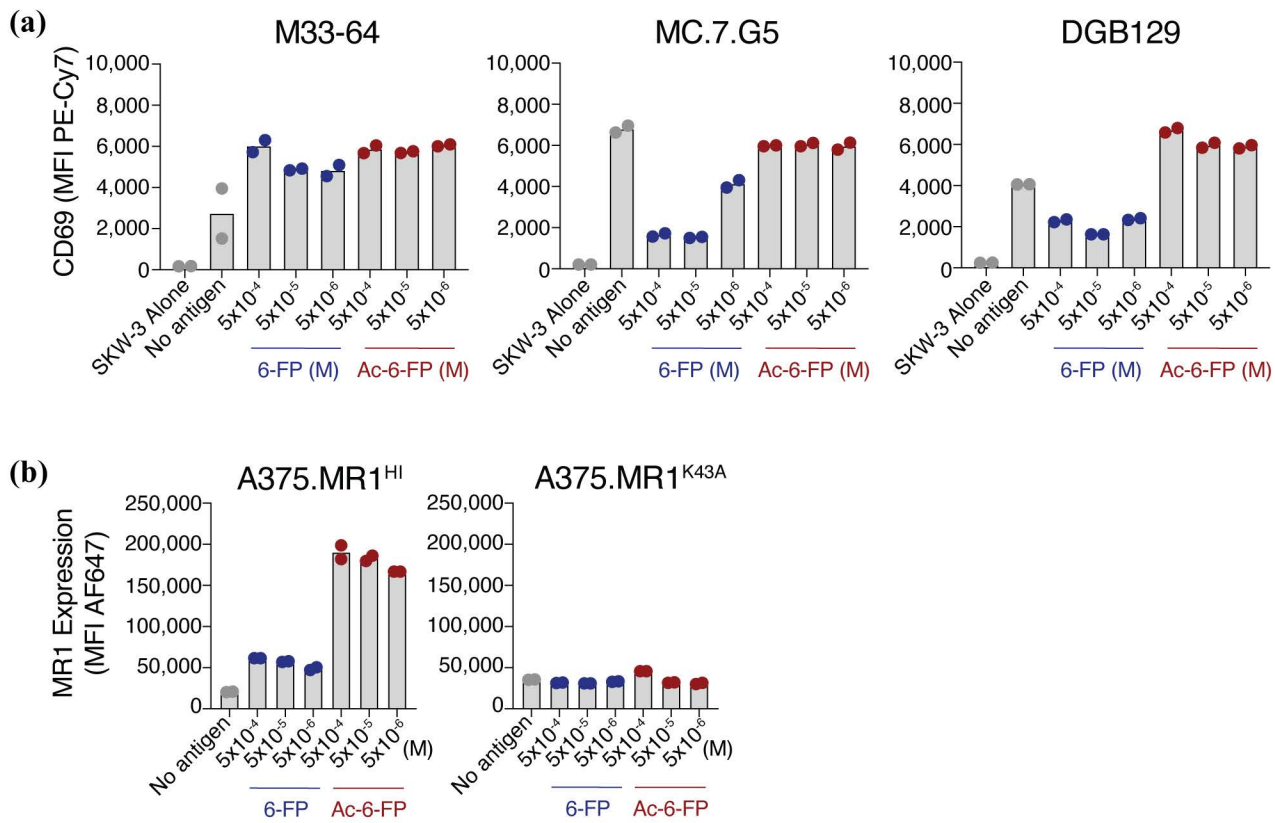

**Supplementary Figure 2: Effects on activation by 6-FP and Ac-6-FP. (a)** Bar graphs showing activation of TCR-expressing SKW-3 cells as measured by CD69, after co-culture with C1R.MR1<sup>HI</sup> cells **(b)** Bar graphs showing the MFI of MR1 expression on A375.MR1<sup>HI</sup> or A375.MR1<sup>K43A</sup> cells when pulsed with titrating concentrations of 6-FP or Ac-6-FP. Points on all plots are replicate wells, and data is representative of n = 3 independent experiments.

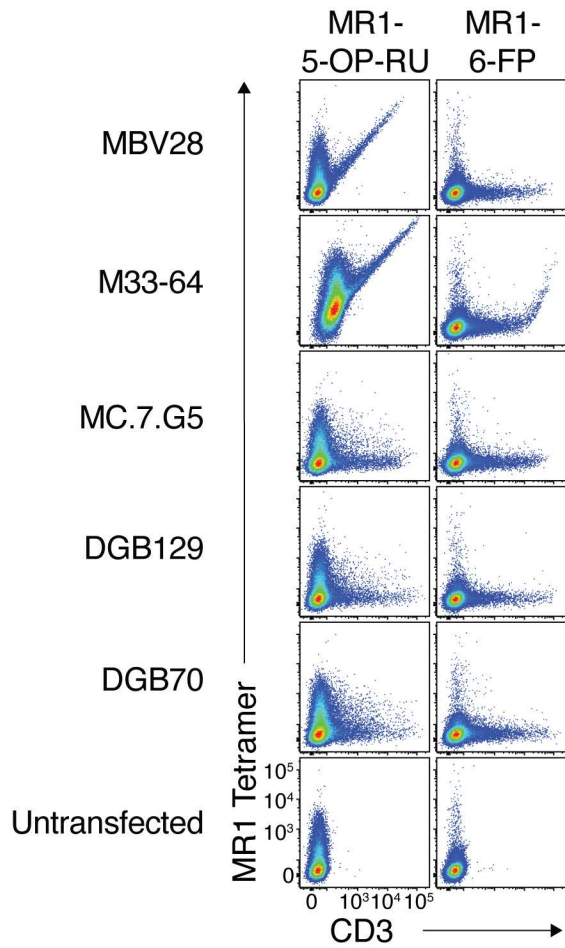

**Supplementary Figure 3: MR1 tetramer staining of MR1-restricted TCRs.** Flow cytometric contour plots showing MR1-5-OP-RU and MR1-6-FP tetramer staining on 293T cells transiently transfected to express diverse MR1-restricted TCRs. Experiment is representative of 2 independent experiments.

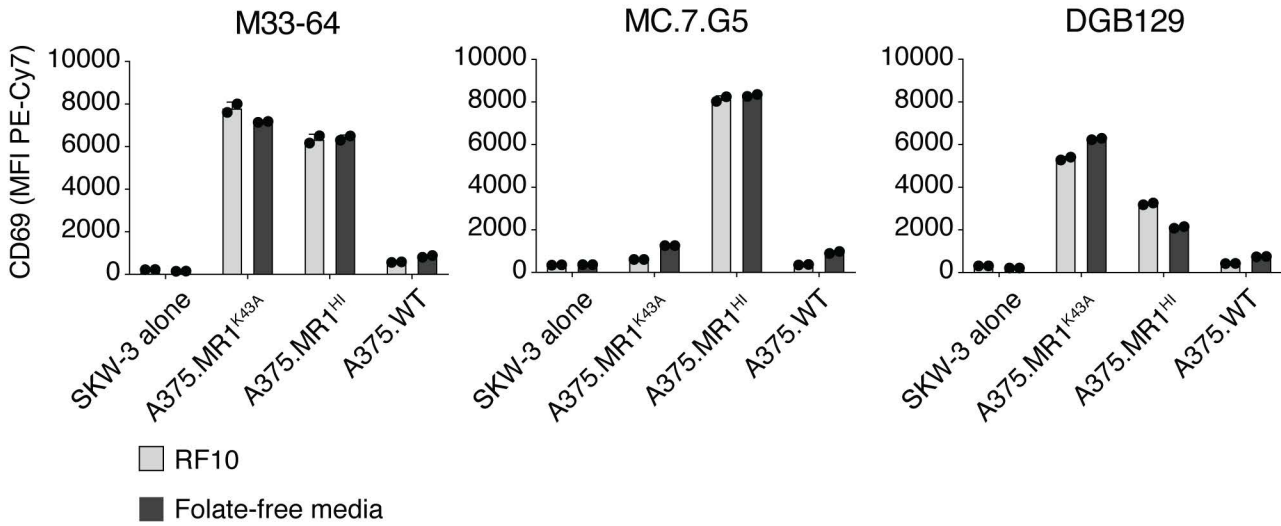

**Supplementary Figure 4: Folate-free media has no effect on activation of MR1-restricted TCRs.** Bar graphs showing activation of TCR-expressing SKW-3 cells as measured by CD69, after co-culture with a panel of antigen-presenting cell lines that had been cultured for 48 hours in normal RF10 media, or RF10 media that used folate-free RPMI-1640 as a base. Points on plots are replicate wells, and data is representative of n = 2 independent experiments.

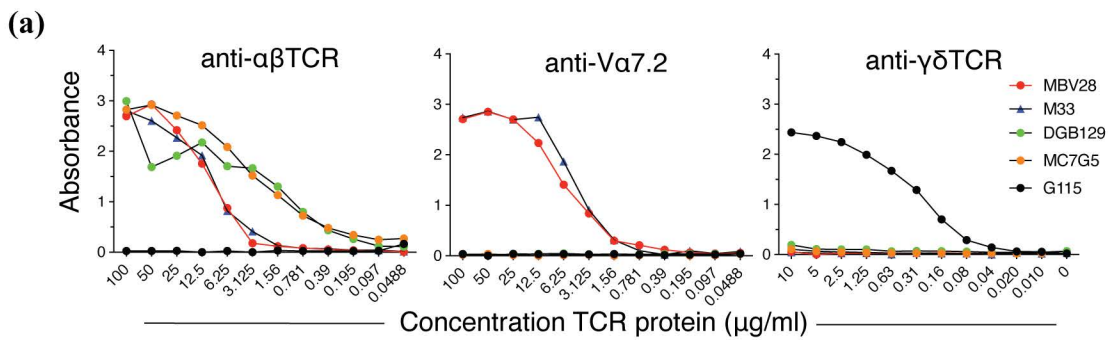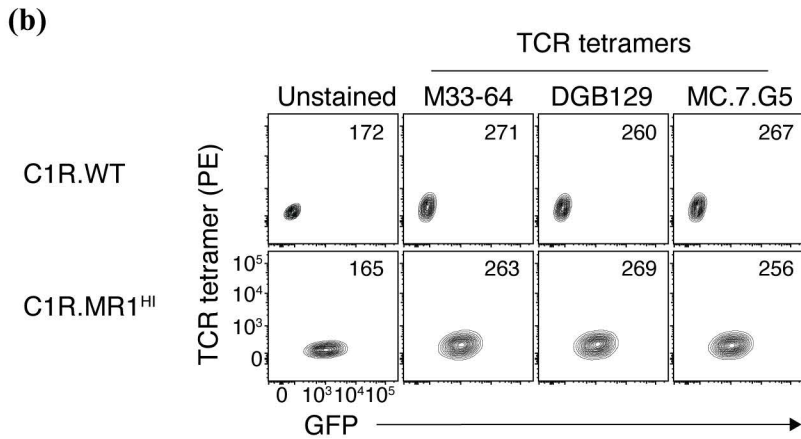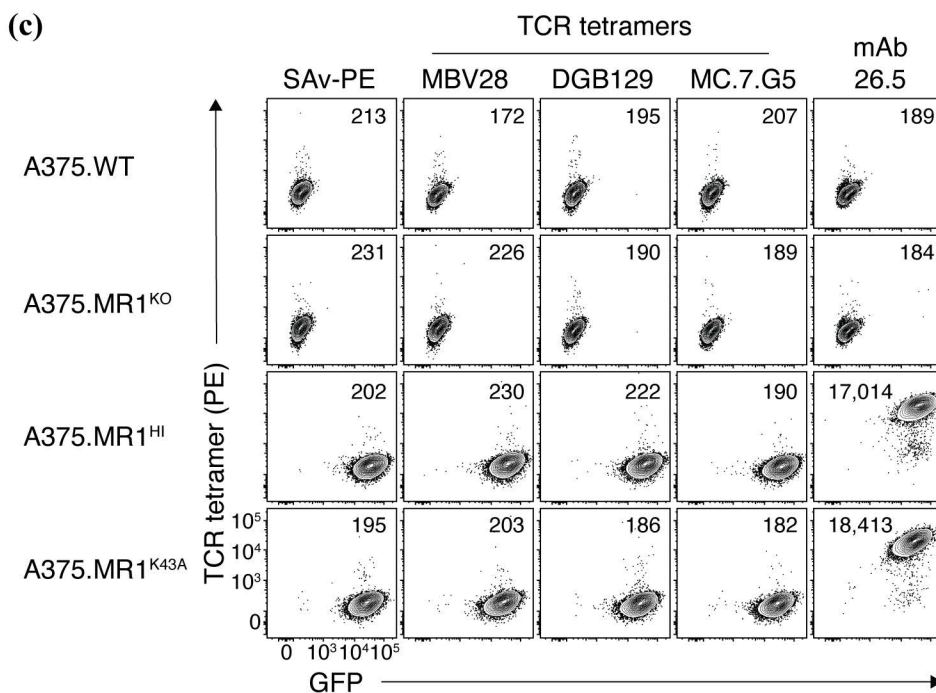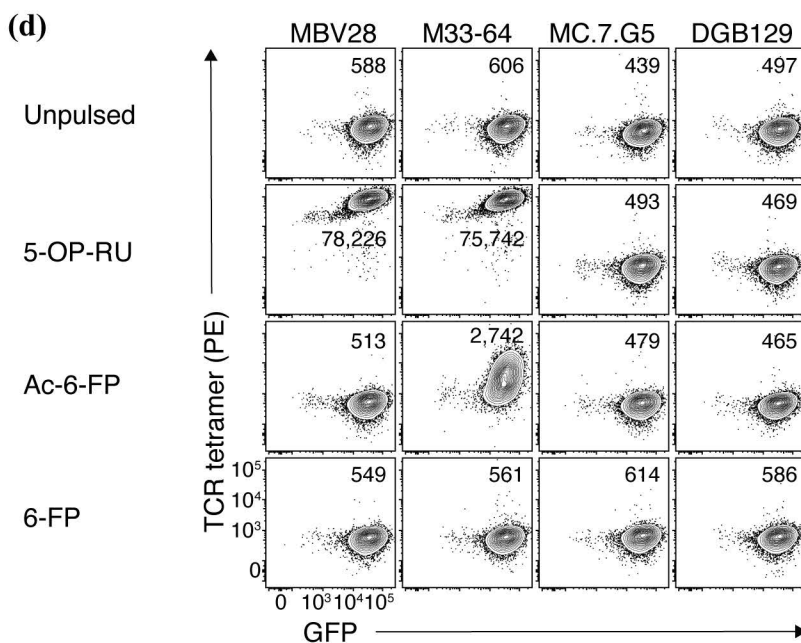

**Supplementary Figure 5: TCR tetramers fail to stain MR1-overexpressing cell lines.** (a) ELISA showing binding of anti- $\alpha\beta$ TCR, anti-V $\alpha$ 7.2 or anti- $\gamma\delta$ TCR to soluble TCR proteins. (b-d). Flow cytometric contour plots showing TCR tetramer staining on (b) C1R cell lines, (c) A375 cell lines, or (d) A375.MR1<sup>HI</sup> cell lines pulsed for 4 hours with 10  $\mu\text{M}$  5-OP-RU, 500  $\mu\text{M}$  Ac-6-FP or 500  $\mu\text{M}$  6-FP. Plots are representative of  $n = 2$  independent experiments. Numbers in top right of plots indicate MFI of tetramer staining
